# Supplementary material for: Unravelling the role of transient redox partner complexes in P450 electron transfer mechanics
Source: PubMed Central journal article supplement (PMC9519919; doi:10.1038/s41598-022-20671-0), 2022-09-28
Supplement: 41598_2022_20671_MOESM1_ESM.pdf [file 41598_2022_20671_MOESM1_ESM.pdf]

## Supplementary Information:

# Unravelling the role of transient redox partner complexes in P450 electron transfer mechanics

Tatiana Y. Hargrove<sup>1</sup>, David C. Lamb<sup>2</sup>, Jarrod A. Smith<sup>1,4</sup>, Zdzislaw Wawrzak<sup>3</sup>, Steven L. Kelly<sup>2</sup>, Galina I. Lepesheva<sup>1,4\*</sup>

<sup>1</sup>Department of Biochemistry, Vanderbilt University School of Medicine, Nashville, Tennessee 37232, USA

<sup>2</sup>Faculty of Health, Medicine and Life Science, Swansea University, Swansea, SA2 8PP, UK.

<sup>3</sup>Synchrotron Research Center, Life Science Collaborative Access Team, Northwestern University, Argonne, Illinois 60439, USA

<sup>4</sup>Center for Structural Biology, Vanderbilt University, Nashville, Tennessee 37232, USA

\*Corresponding author: galina.i.lepesheva@vanderbilt.edu

## This file contains:

1. Supplementary Table S1 (Data collection and refinement statistics)
2. Supplementary Fig. S1 (The asymmetric unit of *M. capsulatus* CYP51)
3. Supplementary Fig. S2 (Structure superimposition and structure-based sequence alignment)
4. Supplementary Fig. S3 (Spectral responses to the binding of sterol substrates)
5. Supplementary Table S2 (Active site cavity lining residues)
6. Supplementary Fig. S4 (Rearrangements in the *M. capsulatus* CYP51 proton relay network)
7. Supplementary Fig. S5 (A Coot snapshot of the 2F<sub>0</sub>-F<sub>c</sub> density map)
8. Supplementary Fig. S6 (Molecular-dynamics trajectories)
9. Supplementary Fig. S7 (Possible ET path in *M. capsulatus* CYP51-fx)
10. Supplementary Fig. S8 (Overlaid ferredoxin structures and the *M. capsulatus* fx model)
11. Supplementary Fig. S9 (Alignment of bacterial CYP51-fused and mammalian ferredoxins)

**Supplementary Table S1. Data collection and refinement statistics.**

| <b>PDB ID</b>                                | <b>7SNM</b>                     |
|----------------------------------------------|---------------------------------|
| <i>Data collection</i>                       |                                 |
| Wavelength, Å                                | 1.000                           |
| Space group                                  | P <sub>1</sub> 2 <sub>1</sub> 1 |
| Cell dimensions                              |                                 |
| a, b, c, Å                                   | 73.2 206.20 81.4                |
| α, β, γ, °                                   | 90.0 114.1 90.0                 |
| Molecules per asymmetric unit                | 4                               |
| Resolution (upper shell), Å                  | 74.45-2.55 (2.62-2.55)          |
| Solvent content, %                           | 47.7                            |
| R <sub>merge</sub> (upper shell)             | 0.065 (0.637)                   |
| CC (1/2) (upper shell)                       | 0.998 ( 0.960)                  |
| I/σ(I) (upper shell)                         | 13.4 (2.2)                      |
| Completeness (upper shell), %                | 99.0 (99.9)                     |
| Redundancy (upper shell)                     | 7.1 (7.4)                       |
| <i>Refinement</i>                            |                                 |
| No. of reflections                           | 67008                           |
| R <sub>work</sub> /R <sub>free</sub>         | 0.204/0.246                     |
| R.m.s deviations                             |                                 |
| Bond lengths, Å                              | 0.002                           |
| Bond angles, °                               | 1.3                             |
| Ramachandran plot                            |                                 |
| Favorable/allowed, %                         | 94.0/99.8                       |
| Outliers, %                                  | 0.2                             |
| Average B factor, Å <sup>2</sup>             | 54.9                            |
| <i>Model</i>                                 |                                 |
| No. of atoms                                 | 14767                           |
| No. of residues per molecule                 |                                 |
| Protein (B factor, Å <sup>2</sup> , A/B/C/D) | 443 (45.5/48.6/66.6/77.7)       |
| Heme (B factor, Å <sup>2</sup> )             | 1 (13.8/16.2/35.5/31.0)         |
| Water (B factor, Å <sup>2</sup> )            | 341 (47.1)                      |
| Lanosterol [Lan] (B factor, Å <sup>2</sup> ) | 1 (13.5/20.0/31.0/34.3)         |

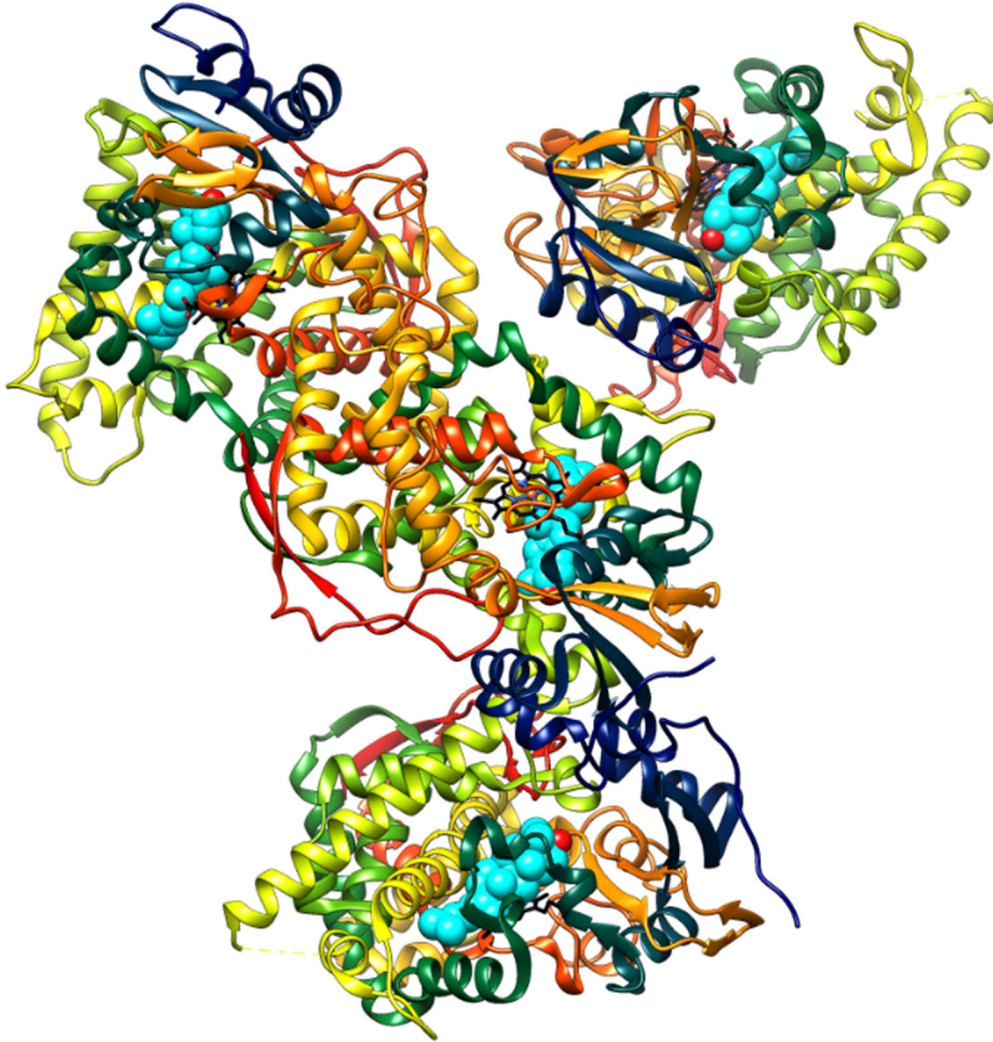

**Supplementary Figure S1. The asymmetric unit of *M. capsulatus* CYP51.** Four polypeptide chains of the P450 molecule are shown in a rainbow-colored ribbon representation, from the N-terminus (blue) to the C-terminus (red). The heme is seen in a stick representation, the carbon atoms are black. The atoms of lanosterol are presented as spheres, the carbons are cyan. The RMSD of  $C\alpha$  between the four molecules is 0.35 Å.

**a**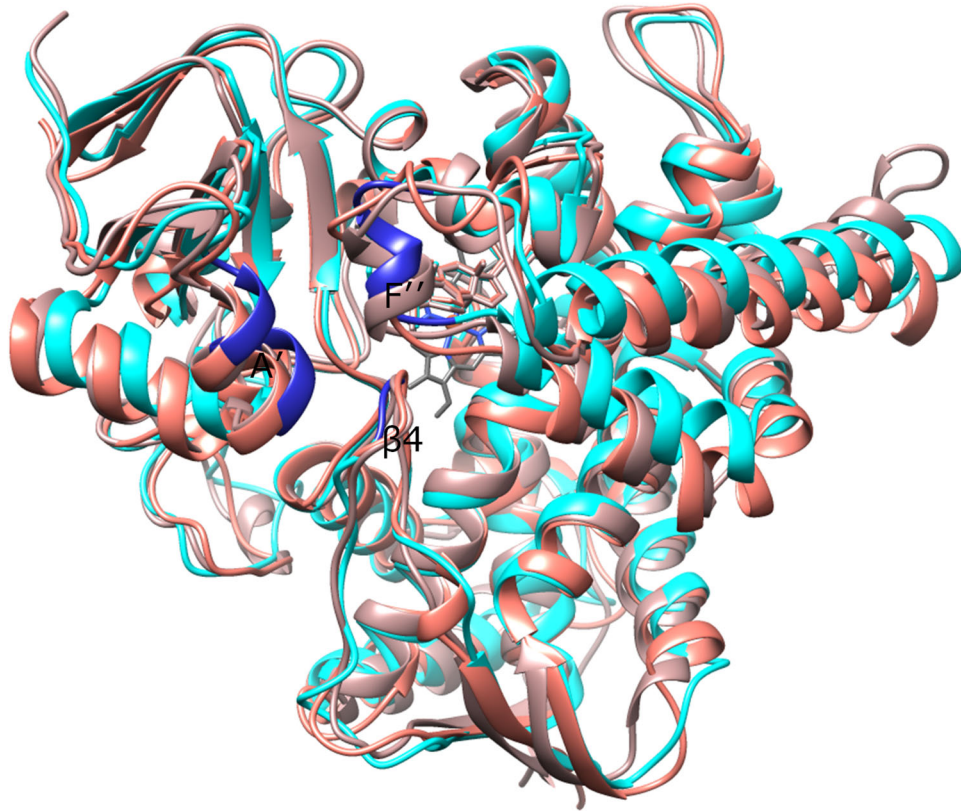**b**

```

Conservation:          4994 4   949994 99949 494          4 94 4 4 444 4 4 44 4 44 49 9   49 4 499499 9944444 44 494 49   9 44 4 4
6uez_chainA_p002      1  KGKLPPIYFSPPIPLGHAIAPGKSPIEFLFNAYEKY-GPVFSFTMVGKTFTYLLGSDAAALFNSKNDLNAEDVYSRLTFVFVGKGVAYDVPNPVFLFEQKMLKSLGLNIAHFKQHV 116
6fmo_chainA_p003      1  ---LPPVYPTVPFLGHIVQFGKNPLEFMQRCKRDLKSGVFTISIGQRTVIVGDPHEHSRRFFSPRNEILSPREVI-TFMTPVFGEGVAYAAPYPRMREQLNFLAEELTIAKFNQFV 113
7snmA.pdb_chainA_s001 1  -SNTPPPVKPGLLLLGHILEFGKNPHAFLMALRHEF-GDVAEFRMFHORMVLLTGSQASEAFYRAPDEVLDQGPAY-RIMTPIFGRGVVFDARIERKNQQLQMLPALRDKPMRTYS 114
Consensus_aa:
Consensus_ss:          hhh  hhhhhhhhhhhhh  eeeee  eeeee  hhhhhhhhh  hhh  hhhh  eee  hhhhhhhhhhhhh  hhhhhhhhh

Conservation:          49 94          4 4 9 44449 4449 9444499 9 4 9 99          4 4 4 4 449 9 44          4 4 9 4 44 4 4 4          4
6uez_chainA_p002      117 SIIEKETKEYFES--WGSEGEKNVFEALSELIILTASHCLHGKEIRSQLN---EKVAQLYADLAGGFSHAWLLPG-WLP---LPSFRRDRAHREIKDIFYKAIQKRRQS---Q 219
6fmo_chainA_p003      114 PAIQHEVRKFMAENWKEDEGVINLLEDCGAMIINTACQCLFGEDLRKRLNARHFAQLLSKMES---SLIPAAVFMPWLLRLP--LPOSARCREARAELQKILGEIIVAREKEEASKD 225
7snmA.pdb_chainA_s001 115 EIIIAEVEAMLRD--WKDAGTIDLLELTKELTYTSSHCLLGAEFRHELN---TEFAGIYRDLEMGIOPIAYVFP--NLPLPVFKRRDQARVRLQELVTOIMERRARSQ--E--- 217
Consensus_aa:
Consensus_ss:          hhhhhhhhhhhhh  hh  hhhhhhhhhhhhhhhhh  h  hhhhhhhhhhhhhhhhhhhhhhh  hh  hhhhhhhhhhhhhhhhhhhhhhhhhhhhhhh

Conservation:          4 44 9449 9 99 44 494 99444 49944994 9449 9 4 4 4 4 944          4444 4 44 4444449 494 994 9944
6uez_chainA_p002      220 EKIDDILQTLLDATYKDGRPLTDDEVAGMLIGLLLAGQTSSTTSAWMGFLAR--DKTLQKKCYLEQKTVCGENLPPLTYDQLK--DLNLLDRCIKETLRLRPPIMIMMRMARTPQT 333
6fmo_chainA_p003      226 NNTSDLLGLLLKAVYRDGTRMSLHEVCGMIVAAMFAGQHTSTITTSWSMLHLMHPKNRKWLDRLKHEIDEF---PAQLNYDNVMDEMPFAERCVRESIRRDPLLLMVMRMVKAEVK 338
7snmA.pdb_chainA_s001 218 -RSTNVFQMLLDASYDDGSKLTPEIPCGMLIATIFAGHTSSGTTAWVLLELLR--REYLRRVRAEIDALFET-HGRVTFESLR--QMPOLENVIKEVLRLHPLLLLMRKVMKDFE 329
Consensus_aa:
Consensus_ss:          hhhhhhhhhhh  hhhhhhhhhhhhhhh  hhhhhhhhhhhhhhhhh  hhhhhhhhhhhhhhhhh  hhhh  hhhhhhhhhhhhhhh  hhhh  ee

Conservation:          9 44 44 9 44 49 4 44 4 4444 44449494          4 4 9949494949 99 94949 4 49 949 9          4 49 4944 9 4 4449 4
6uez_chainA_p002      334 VAGYTIPPGGHVCVSPTVNQRLKDSWVERLDFNPDRYLQDNPASGEKFAYVPFGAGRHRCIGENFAYVQIKTIWSTMLRLVFDLLIDGY-FPTVNYTMIHTPEN-P-VIRYKRRS- 446
6fmo_chainA_p003      339 VGSYVVPKGDIIIACSPLLSHHDEAFFPNRLNDPERD-----EKVDGAFIFGGAGVHKCIGQFALLQVKTILATAFREYDPQLLRDE-VPDPDXHTMVVGPTLNQCLVKYTRRKK 448
7snmA.pdb_chainA_s001 330 VQGMRIEAGKFVCAPSPVTHRIPELFPNELFDPDRYTPERAEDKLYGQAFGGRHKCSGNAFAMFQIKAIVCVLLRNVEFELAAAPESYRDDYRKMVVEPAS-PCLIRYR-RR- 443
Consensus_aa:
Consensus_ss:          e  eee  eeee  hhhh  hh  -c-c@A@ltFGAGRHKCIGSFAHIQIKTILthLRpYF-Lictb.hPcsDY+TMVVsPhs.P.LIRY+.R+.  eee  eeeee

```

**Supplementary Figure S2. a. Superimposition of the substrate-bound *M. capsulatus*, human, and *T. cruzi* CYP51s.** The coloring is as in Fig. 3b. The secondary structural elements that form the substrate entry (helices A', F'', and the  $\beta$ 4 hairpin) are colored in blue on the *M. capsulatus* structure. **b. Structure-based sequence alignment (PROMALS3D).** Sequences are colored according to secondary structures (red: alpha-helix, blue: beta-strand). Conservation indices above 3 are shown.

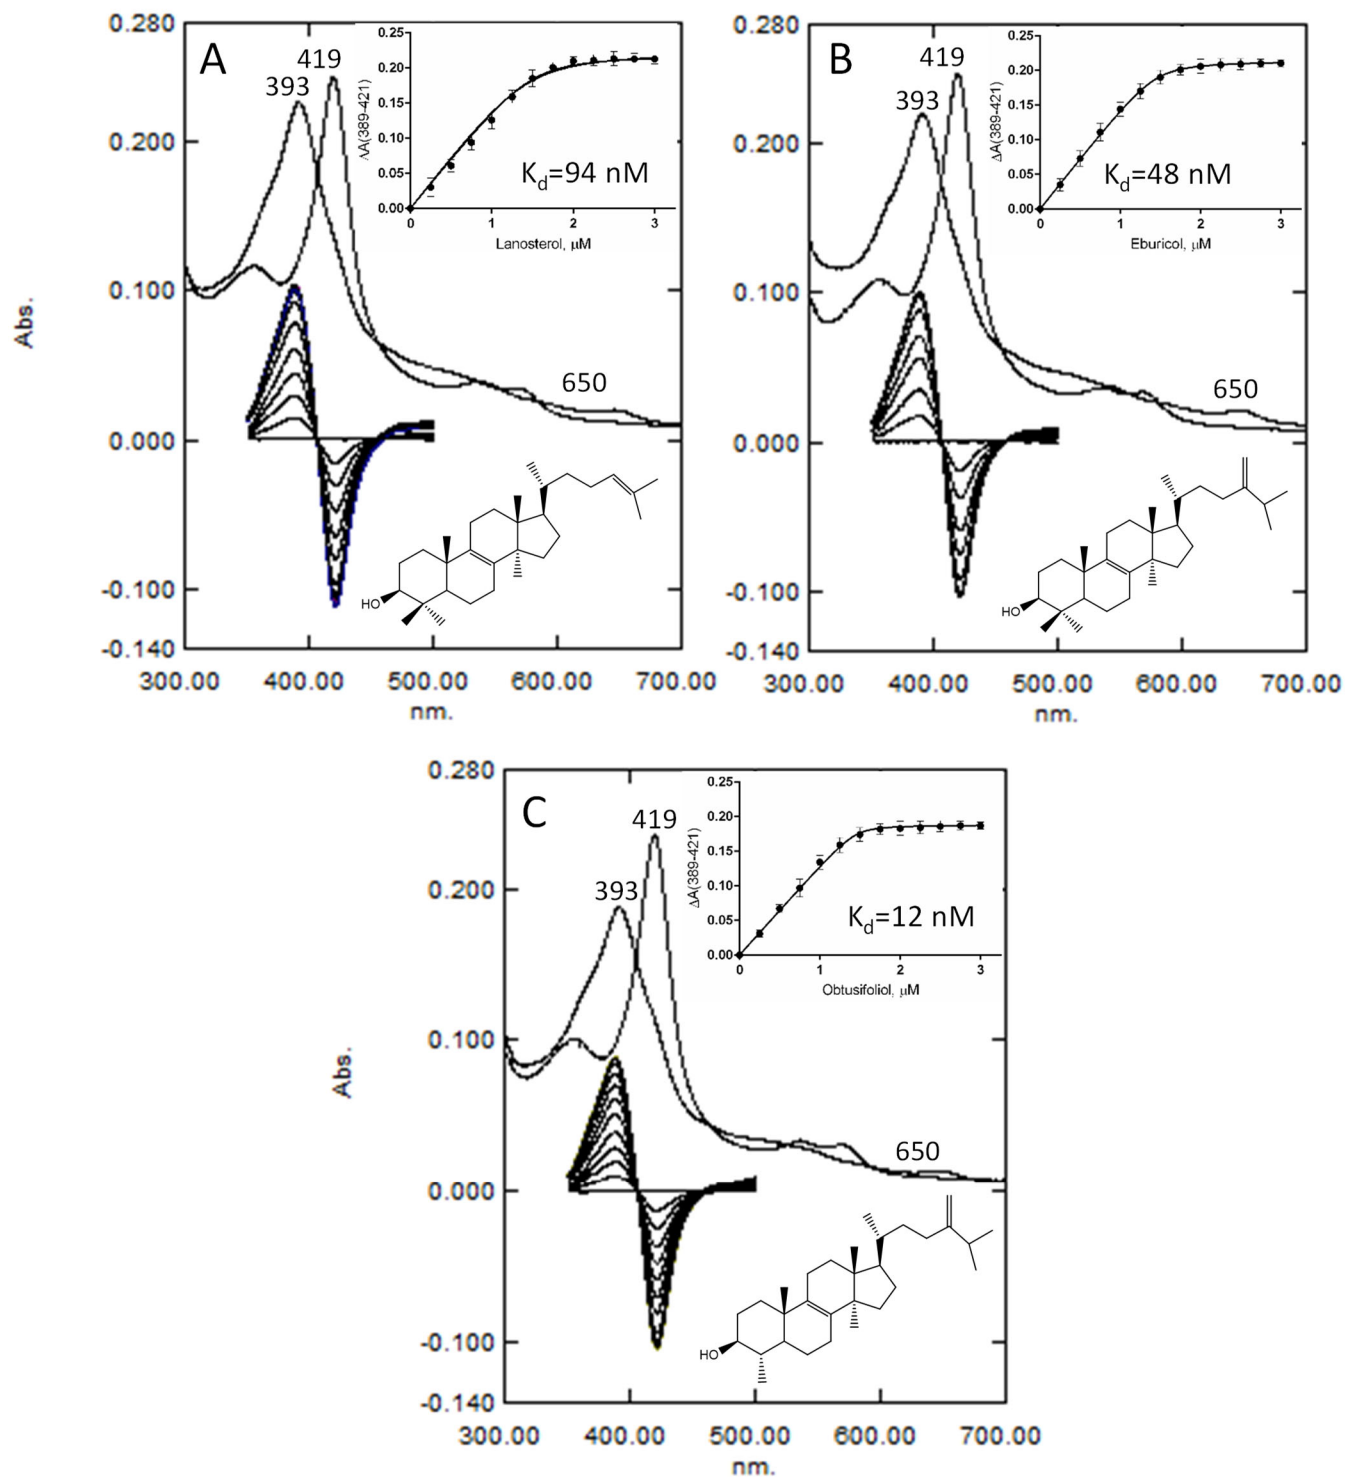

Supplementary Figure S3. Spectral changes observed during titration of *M. capsulatus* CYP51-fx with (A) lanosterol (B) eburicol, and (C) obtusifoliol. Absolute (top) and difference (bottom) spectra. The P450 concentration was  $\sim 2$   $\mu\text{M}$ . Inset: The titration curves fitted to the quadratic (Morrison) equation.

**Supplementary Table S2.** Active site cavity lining residues in the substrate-bound bacterial (*M. capsulatus*, 7SNM), protozoan (*T. cruzi*, 6FM0), and mammalian (human, 6UEZ) CYP51 structures

| Structural element                 | <i>M. capsulatus</i>                                                                                    | Human<br>D231A/H314A                                                                                         | <i>T. cruzi</i><br>I105F                                                                                |
|------------------------------------|---------------------------------------------------------------------------------------------------------|--------------------------------------------------------------------------------------------------------------|---------------------------------------------------------------------------------------------------------|
|                                    | Substrate<br>(Lanosterol)                                                                               | Substrate<br>(Lanosterol)                                                                                    | Substrate<br>(Obtusifoliol)                                                                             |
| B' helix                           | <b>Y79</b><br>I81<br>M82<br><b>F86</b>                                                                  | <b>Y131</b><br>L134<br>T135<br><b>F139</b>                                                                   | <b>Y103*</b><br>F105<br>M106<br><b>F110</b>                                                             |
| B'' η-turn                         | <b>V90</b><br>V91<br>F92                                                                                | <b>V143</b><br>A144<br>Y145                                                                                  | <b>V114</b><br>A115<br>Y116                                                                             |
| C helix                            | K99<br><b>Q102</b><br>L103<br>M105<br><b>L106</b><br>M107                                               | F152<br><b>Q155</b><br>K156<br>M158<br><b>L159</b>                                                           | M123<br><b>Q126</b><br>L127<br>F129<br><b>L130</b>                                                      |
| F'' helix                          | I181<br><br>Y186                                                                                        | F234                                                                                                         | M204<br>S207<br>L208<br>I209<br>P210<br>V213                                                            |
| G' helix                           |                                                                                                         |                                                                                                              | L219                                                                                                    |
| I helix                            | <b>G249</b><br><b>M250</b><br>L251<br>A253<br>T254<br>F256<br><b>A257</b><br><b>H260</b><br><b>T261</b> | <b>G303</b><br><b>M304</b><br><br>G307<br>L308<br>L310<br><b>A311</b><br><b>A314** (H314)</b><br><b>T315</b> | <b>G283</b><br><b>M284</b><br>I285<br>A287<br>A288<br>F290<br><b>A291</b><br><b>H294</b><br><b>T295</b> |
| K/b1-4<br>loop                     | <b>P321</b><br>L322<br>I323<br><i>L324***</i>                                                           | <b>P376</b><br>I377<br>M378<br><i>L379***</i>                                                                | <b>P355</b><br>L356<br>L357<br><i>M358***</i>                                                           |
| β1-4                               | L325<br><b>M326</b>                                                                                     | M380<br><b>M381</b>                                                                                          | V359<br><b>M360</b>                                                                                     |
| β4 hairpin                         | <b>M433</b><br>V434                                                                                     | <b>M487</b><br>I488                                                                                          | <b>M460</b><br>V461                                                                                     |
| Total #,<br>volume, Å <sup>3</sup> | 32<br>913                                                                                               | 29<br>865                                                                                                    | 36<br>1203                                                                                              |

\*Residues invariant across the biological kingdoms (**in bold**), \*\*mutant (H314A), \*\*\*H-bond with the substrate OH group (*italic*)



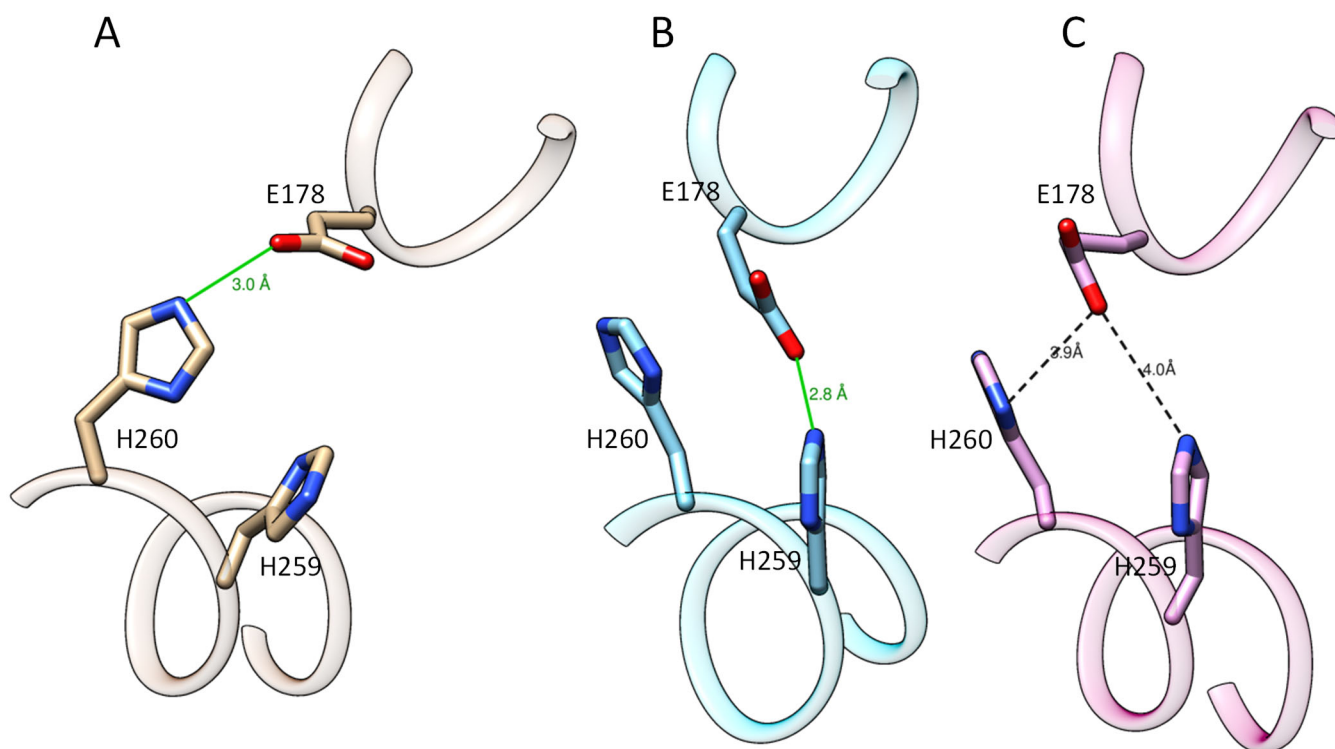

**Supplementary Figure S4. Rearrangements in the proton relay network in *M. capsulatus* CYP51.** Ligand-free (salt bridge E178-H260, 3.0 Å) (A), lanosterol-bound (salt bridge E178-H259, 2.84 Å) (B) structures of *M. capsulatus* CYP51, and a snapshot from MD simulations of the CYP51-ferredoxin complex,  $|\text{Fe-Fe1}|=16.6$  Å. (E178 is freed, proton delivery route activated) (C).

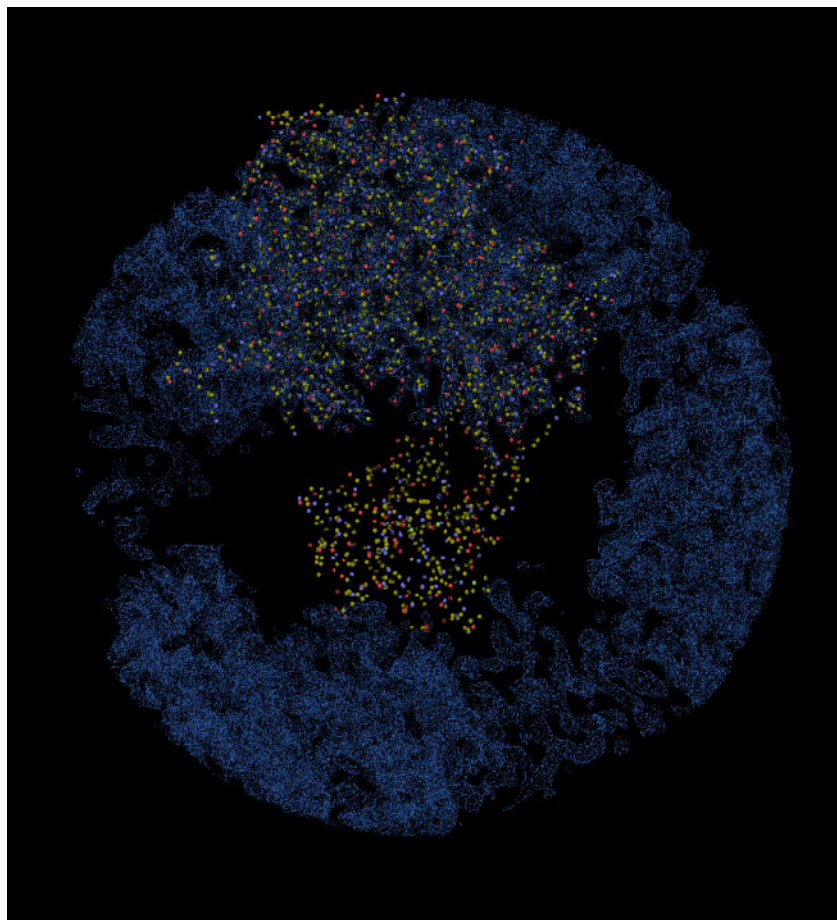

**Supplementary Figure S5. A Coot snapshot of the 2F<sub>0</sub>-F<sub>c</sub> density map contoured at 1.5  $\sigma$ , map radius 50 Å.**

The dots correspond to one molecule of P450 (top, proximal face down) and one molecule of ferredoxin (bottom, the docked pose, selected for MD simulations). The electron density is clearly seen for the P450 domain only, while any density close to the proximal P450 surface (where the ferredoxin domain is supposed to interact) is absent.



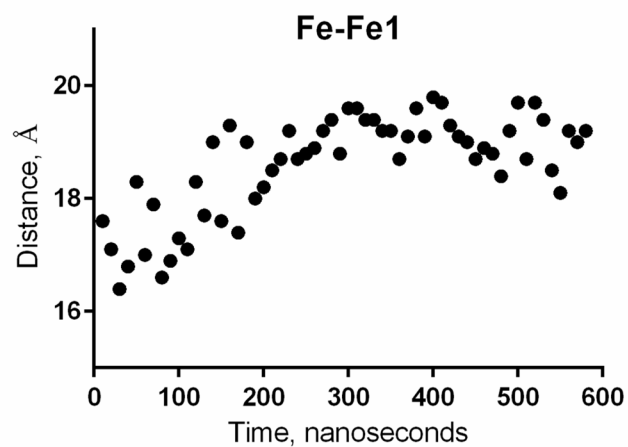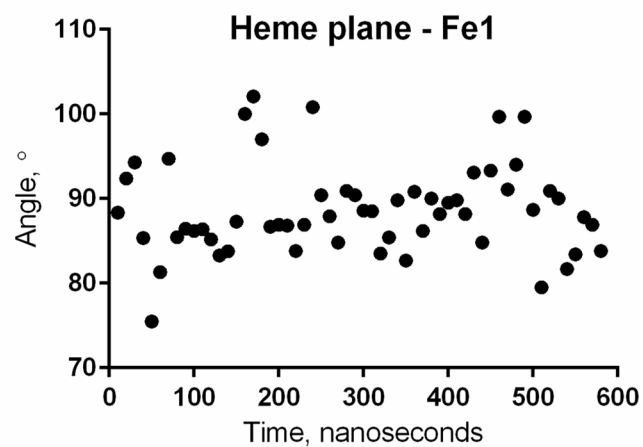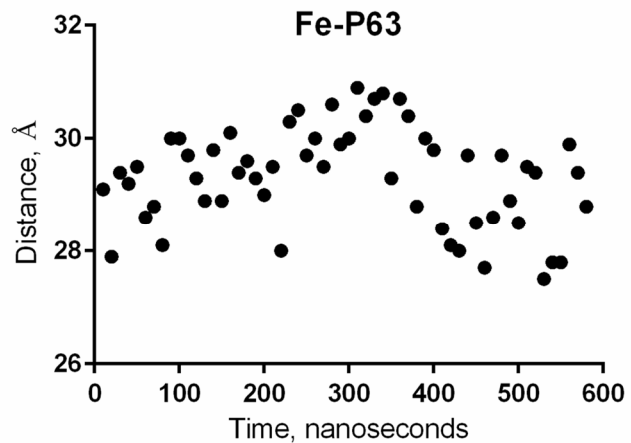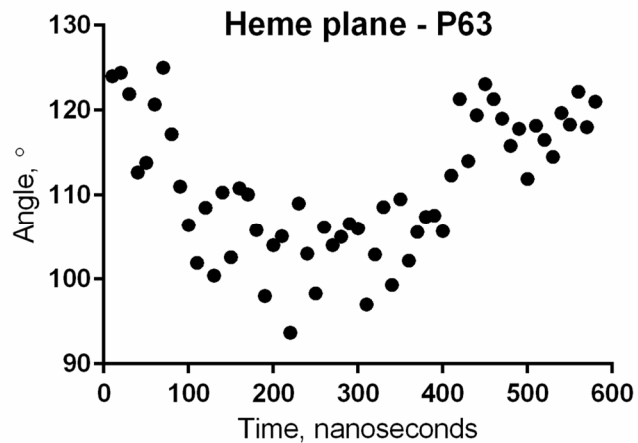

**Supplementary Figure S6. Molecular-dynamics trajectories.** The pbd files were written each 10 ns. The maximal Fe-Fe1 distance of 19.8 Å (at 400 ns of the 600 ns run) is perfectly compatible with electron transfer, the calculated  $K_{ET}$  value being 1.51/sec (or 90.8 electron transfer events per minute).

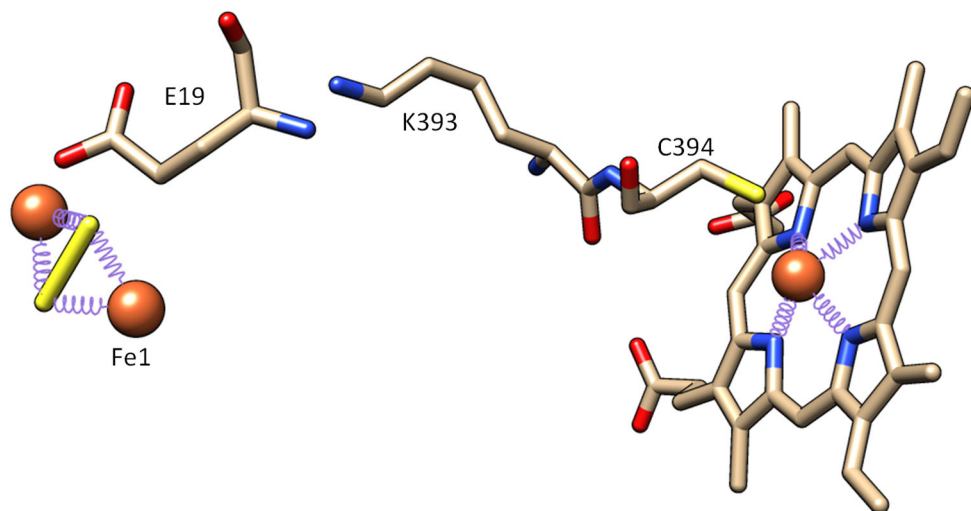

**Supplementary Figure S7. Possible ET path in *M. capsulatus* CYP51-fx.**

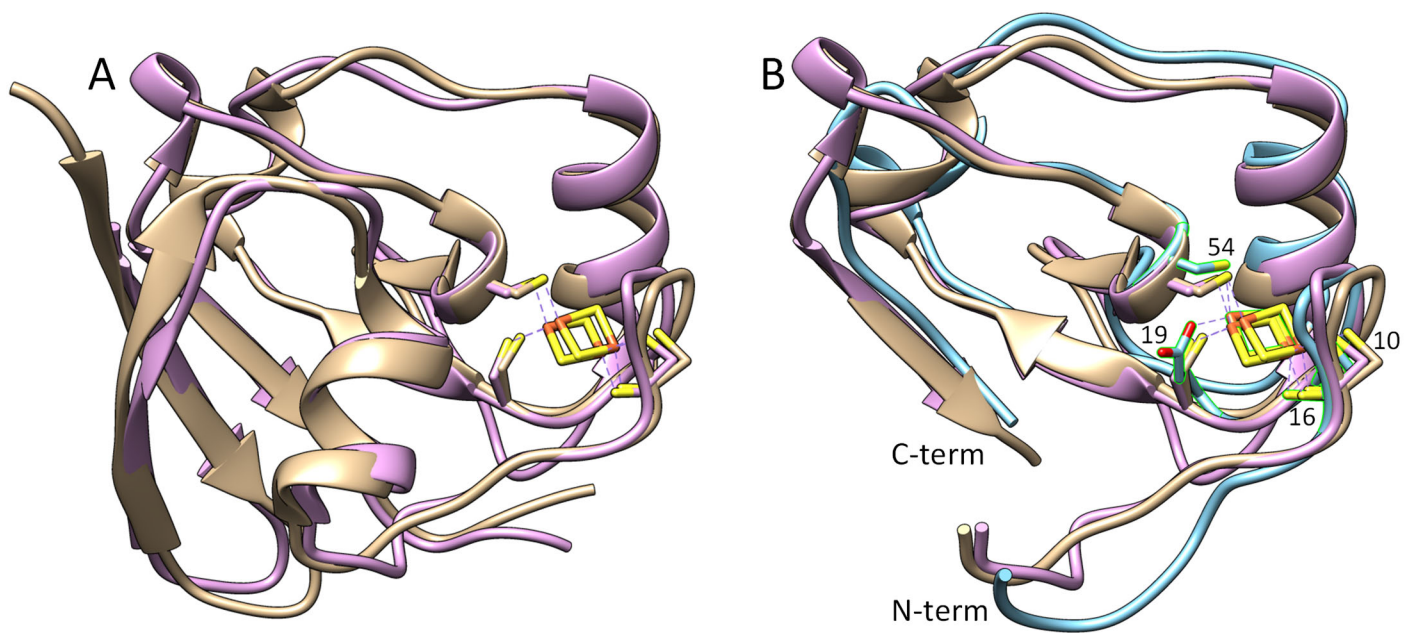

**Supplementary Figure S8. Ferredoxins that serve as P450 redox partners display highly conserved structural fold.** **A.** Overlaid structures of putidaredoxin from *Pseudomonas putida* [1OQQ, tan] and adrenodoxin from human [2Y5C, plum]. **B.** The 35-103 fragments of the same structures overlaid with the model of *M. capsulatus* ferredoxin fusion (blue). The 2Fe-2S cluster, Cys10, 16, 54, and Glu19 of the model are selected (in green) and the residues are numbered.

```

Bull      :SSSEDKITVHFVNRDGETLTTGKIGDSDLVYVQNNLDIDGFGA*E*TLACSTH-L*E*EQHIFEK*EA*TDDEENDMLDLAYGLTDRSRLGCQ*LT*KNMTMTVVRVPEAVDARES*IDMGMNSSKIE*~::~128
Pig       :SSSEDKITVHFVNRDGETLTTGKIGDSDLVYVQNNLDIDGFGA*E*TLACSTH-L*E*EDHIFEK*EA*TDDEENDMLDLAYGLTDRSRLGCQ*LT*KNMTMTVVRVPEAVADARES*IDLGNSSKLE*~::~128
Cat       :SSSEDKITVHFVNRDGETLTTGKIGDSDLVYVQNNLDIDGFGA*E*TLACSTH-L*E*EDHIFEK*DA*TDDEENDMLDLAYGLTDRSRLGCQ*LT*KNMTMTVVRVPEAVADARQSI*DVGKNS*~::~124
Human     :SSSEDKITVHFVNRDGETLTTGKIGDSDLVYVQNNLDIDGFGA*E*TLACSTH-L*E*EDHIFEK*DA*TDDEENDMLDLAYGLTDRSRLGCQ*LT*KNMTMTVVRVPEAVADARQSI*DVGKNSAENLYFQ*::131
Marmota   :SSSEDKITVHFVNRDGETLTTGKIGDSDLVYVQNNLDIDGFGA*E*TLACSTH-L*E*EDHIFEK*EA*TDDEENDMLDLAYGLTDRSRLGCQ*LT*KNMTMTVVRVPEAVADARQSI*DVGKNS*~::~124
Ketobacter :-----YR*H-----RQ*G*AMCMGE*H*E*Q*DDHNO*H*PNDAPT*-----IASIEQANR*AKH*NO*G*AVEGQ*-----: 66
Pseudomonadales :-----FR*H-----TQ*G*AMCMGE*H*E*Q*DANNE*Q*DS*PL*-----MQNLEQAQQ*VRN*NO*G*ELNHHEGTPS*-----: 71
Alcanivoracaceae :-----FR*H-----TQ*G*AMCMGE*H*E*Q*DANNE*Q*DS*PL*-----MQNLEQAQQ*VRN*NO*G*ELNHHEGTPS*-----: 71
Spirochaeta :-----FR*Y-----ED*G*AVCMGE*E*E*E*GEDEK*A*EESPR*-----KDLRKAER*VRV*NRV*E*EEG*-----: 64
Candidatus Microthrix :-----WR*Y-----RD*G*AAOCGE*Q*E*E*SKRGE*T*DERPP*-----DEARAAADA*VKY*TH*S*HEDPTPEDPN*--PEDPQ*-----: 76
Gammaproteobacterium :-----FL*E-----MD*G*ATOCGE*SD*E*H*DESGK*T*KAIVS*-----EGEVEKARL*AKY*TQ*K*VKRGSV*-----: 67
Methylococcus PowLak :-----FL*E-----RD*G*ATOCGE*AD*E*H*DDKGT*T*KAIVS*-----EGEVEKARL*EKY*TK*H*VKRVTL*-----: 67
Methyloctetradococcus :-----FR*A-----MD*G*GNQNAE*E*E*H*DDSGK*T*QTHCE*-----LELLEKARA*AKY*TQ*H*ALDDEVP*-----: 68
Methylococcaceae FW3 :-----FR*A-----MD*G*GNQNAE*E*E*H*DDSGK*T*QAHCE*-----LELLEKARA*AKY*TQ*H*ALDDEAS*-----: 68
Methyloprfundus :-----FR*D-----MD*G*ANQNAE*E*E*Q*DDKGG*S*QDTPN*-----NTLLKKAQA*AEY*TS*K*IQD*-----: 64
Methylomonas lenta :-----FL*Q-----KE*G*ATQTE*E*E*Q*DDAGN*T*QE*Q*P*-----LDLLKFAQQ*EKY*TK*K*KLN*-----: 64
Methylomicrobium wino :-----FR*Y-----RE*G*ATQTE*E*E*Q*DDAGN*T*QENPA*-----LDLLNKARQ*EKY*TQ*K*KLK*-----: 64
Methylolulvum :-----FO*G*-----RA*G*ASQTE*E*E*Q*DDAGN*T*QESPP*-----LDLLAKARQ*EKY*AK*I*KST*-----: 64
Methylobacter marinus :-----FO*G*-----RE*G*ATQNAE*D*E*H*DDAGN*S*QENPP*-----LDLLSKARQ*EKY*TK*S*ELK*-----: 64
Methyloricopusculum :-----FO*G*-----RE*G*ATQTE*E*E*H*DDAGT*T*QENPM*-----LDLLVKARQ*EKY*TK*S*VSTELNHYEE*--KE*-----: 73
Methylosarcinia lacus :-----FO*G*-----RE*G*ATQTE*E*E*H*DDAGN*T*QDNPP*-----LDLLTKARQ*EKY*SK*K*ELNQNP*--RES*--KNGLIS*~::~: 76
Methylococcaceae NSM :-----FO*G*-----RE*G*ATQTE*E*E*H*DDAGN*T*QENPP*-----LDLEKARQ*EKY*TK*K*ESQ*-----: 64
Methylomagnum ishizav :-----IK*A-----WD*G*ANQTE*E*E*Q*DDKGR*T*DENPS*-----PEWVEKRA*EKY*TR*K*EDGE*TEGGR*--PFH*~::~: 74
Methylospira mobilis :-----FO*E-----MD*G*GAC*GE*E*E*H*DEEGR*T*DAQAD*-----HALLEKARQ*EKY*TQ*R*PQTG*-----: 65
M. capsulatus :-----FR*Y-----RD*G*GNQNAE*E*E*H*DEEGR*T*SETPD*-----PVLVGAALA*ERF*AR*K*LPQRDPATRD*--RSLSPSGED*~::~: 80
Methyloterricola ozyz :-----LR*E-----FD*G*SNQTE*E*E*Q*DDKGH*T*QETPD*-----AVLLDKARE*EKH*AR*R*VEEGS*-----: 66
Methylomudiphilus :-----FO*E-----FD*G*ANQNAE*E*E*H*DEKGR*T*DGMPN*-----VMLLQKARS*EKY*AG*S*VIDG*-----: 65
Methylocaldum szegedi :-----FR*L-----FR*G*AHQGE*E*E*H*DEKGR*T*DERPA*-----ATLEKARA*EKY*NR*S*VNESK*-----: 67
Cellulibrionales :-----TL*H-----AQ*G*AMOCGE*DY*E*F*DAASV*H*QNEVQ*-----AGDEEKVHR*VHY*NG*S*BAVQAESAGL*--A*~::~: 72
Spongibacter tropic :-----LO*E-----TV*G*AMOCGE*E*E*H*DEEGL*Q*KP*FD*-----AGQREAVR*VKY*NQ*R*VER*-----: 64
Stenotrophium :-----FR*Y-----RG*G*AMOCGE*E*E*H*DSNNN*E*RKPEIK*-----AEEMEKEVQ*VKI*NS*K*VHE*-----: 64
Sinimarimbacterium :-----FR*Y-----RD*G*ANQNAE*E*E*H*DANGQ*H*KPELT*-----PGAREQVTR*VRV*NS*K*VEGPTP*-----: 67
Aliphilus aromaticiv :-----LR*Y-----RQ*G*AVCMGE*S*AH*E*Q*GADGV*H*KEAVD*-----PGDKARVDQ*VEI*TS*K*VEE*-----: 64
Oleomonas :-----IT*H-----RQ*G*AVCMGE*S*AH*E*Q*GDDGI*K*KEEVS*-----EAELKQVL*ALH*NA*R*VRHG*-----: 66
Zavarzinia comparanso :-----IT*A-----RG*G*AVCMGE*DE*H*GEDGV*LR*KEAVT*-----EAEMAARQS*INV*NA*R*ERR*-----: 64
Saxdarcinus NAT131 :-----VR*R-----RQ*G*AVCMGE*S*E*H*AESGEAE*EAHPP*-----AEQYALLAR*AEH*NO*V*EQGERCP*--H*~::~: 71
Myxococcales bacteriu :-----LN*A-----LD*G*AVCMGE*E*E*Y*DEETKVA*H*DRP*-----DPKHNDVRA*ADY*QRT*Q*EBEALPLD*--ASLPSGCFVAH*~::~: 82
Minicystis rosea :-----YR*S-----LD*G*AA*V*G*E*E*E*RD*GLGR*--R*IDTTP*-----DASLSA*V*EK*AO*E*TKT*Q*EAI*-----: 64

```

**Supplementary Figure S9. Alignment of 5 mammalian ferredoxins and 30 bacterial ferredoxin domains that exist as naturally fused C-terminal portion of CYP51 genes. Four residues that form the interactions with the [Fe<sub>2</sub>-S<sub>2</sub>] cluster are marked with red stars.**
